# Supplementary material for: Regulatory T cells in the bone marrow microenvironment in patients with prostate cancer
Source: PubMed Central journal article supplement — Oncoimmunology. 2012 Mar 1;1(2):152–61. doi: 10.4161/onci.1.2.18480 (PMC3376984; doi:10.4161/onci.1.2.18480), 2012-03-01
Supplement: onci-1-152-s01.pdf [file onci-1-152-s01.pdf]

# Supplementary data

## Figure 1

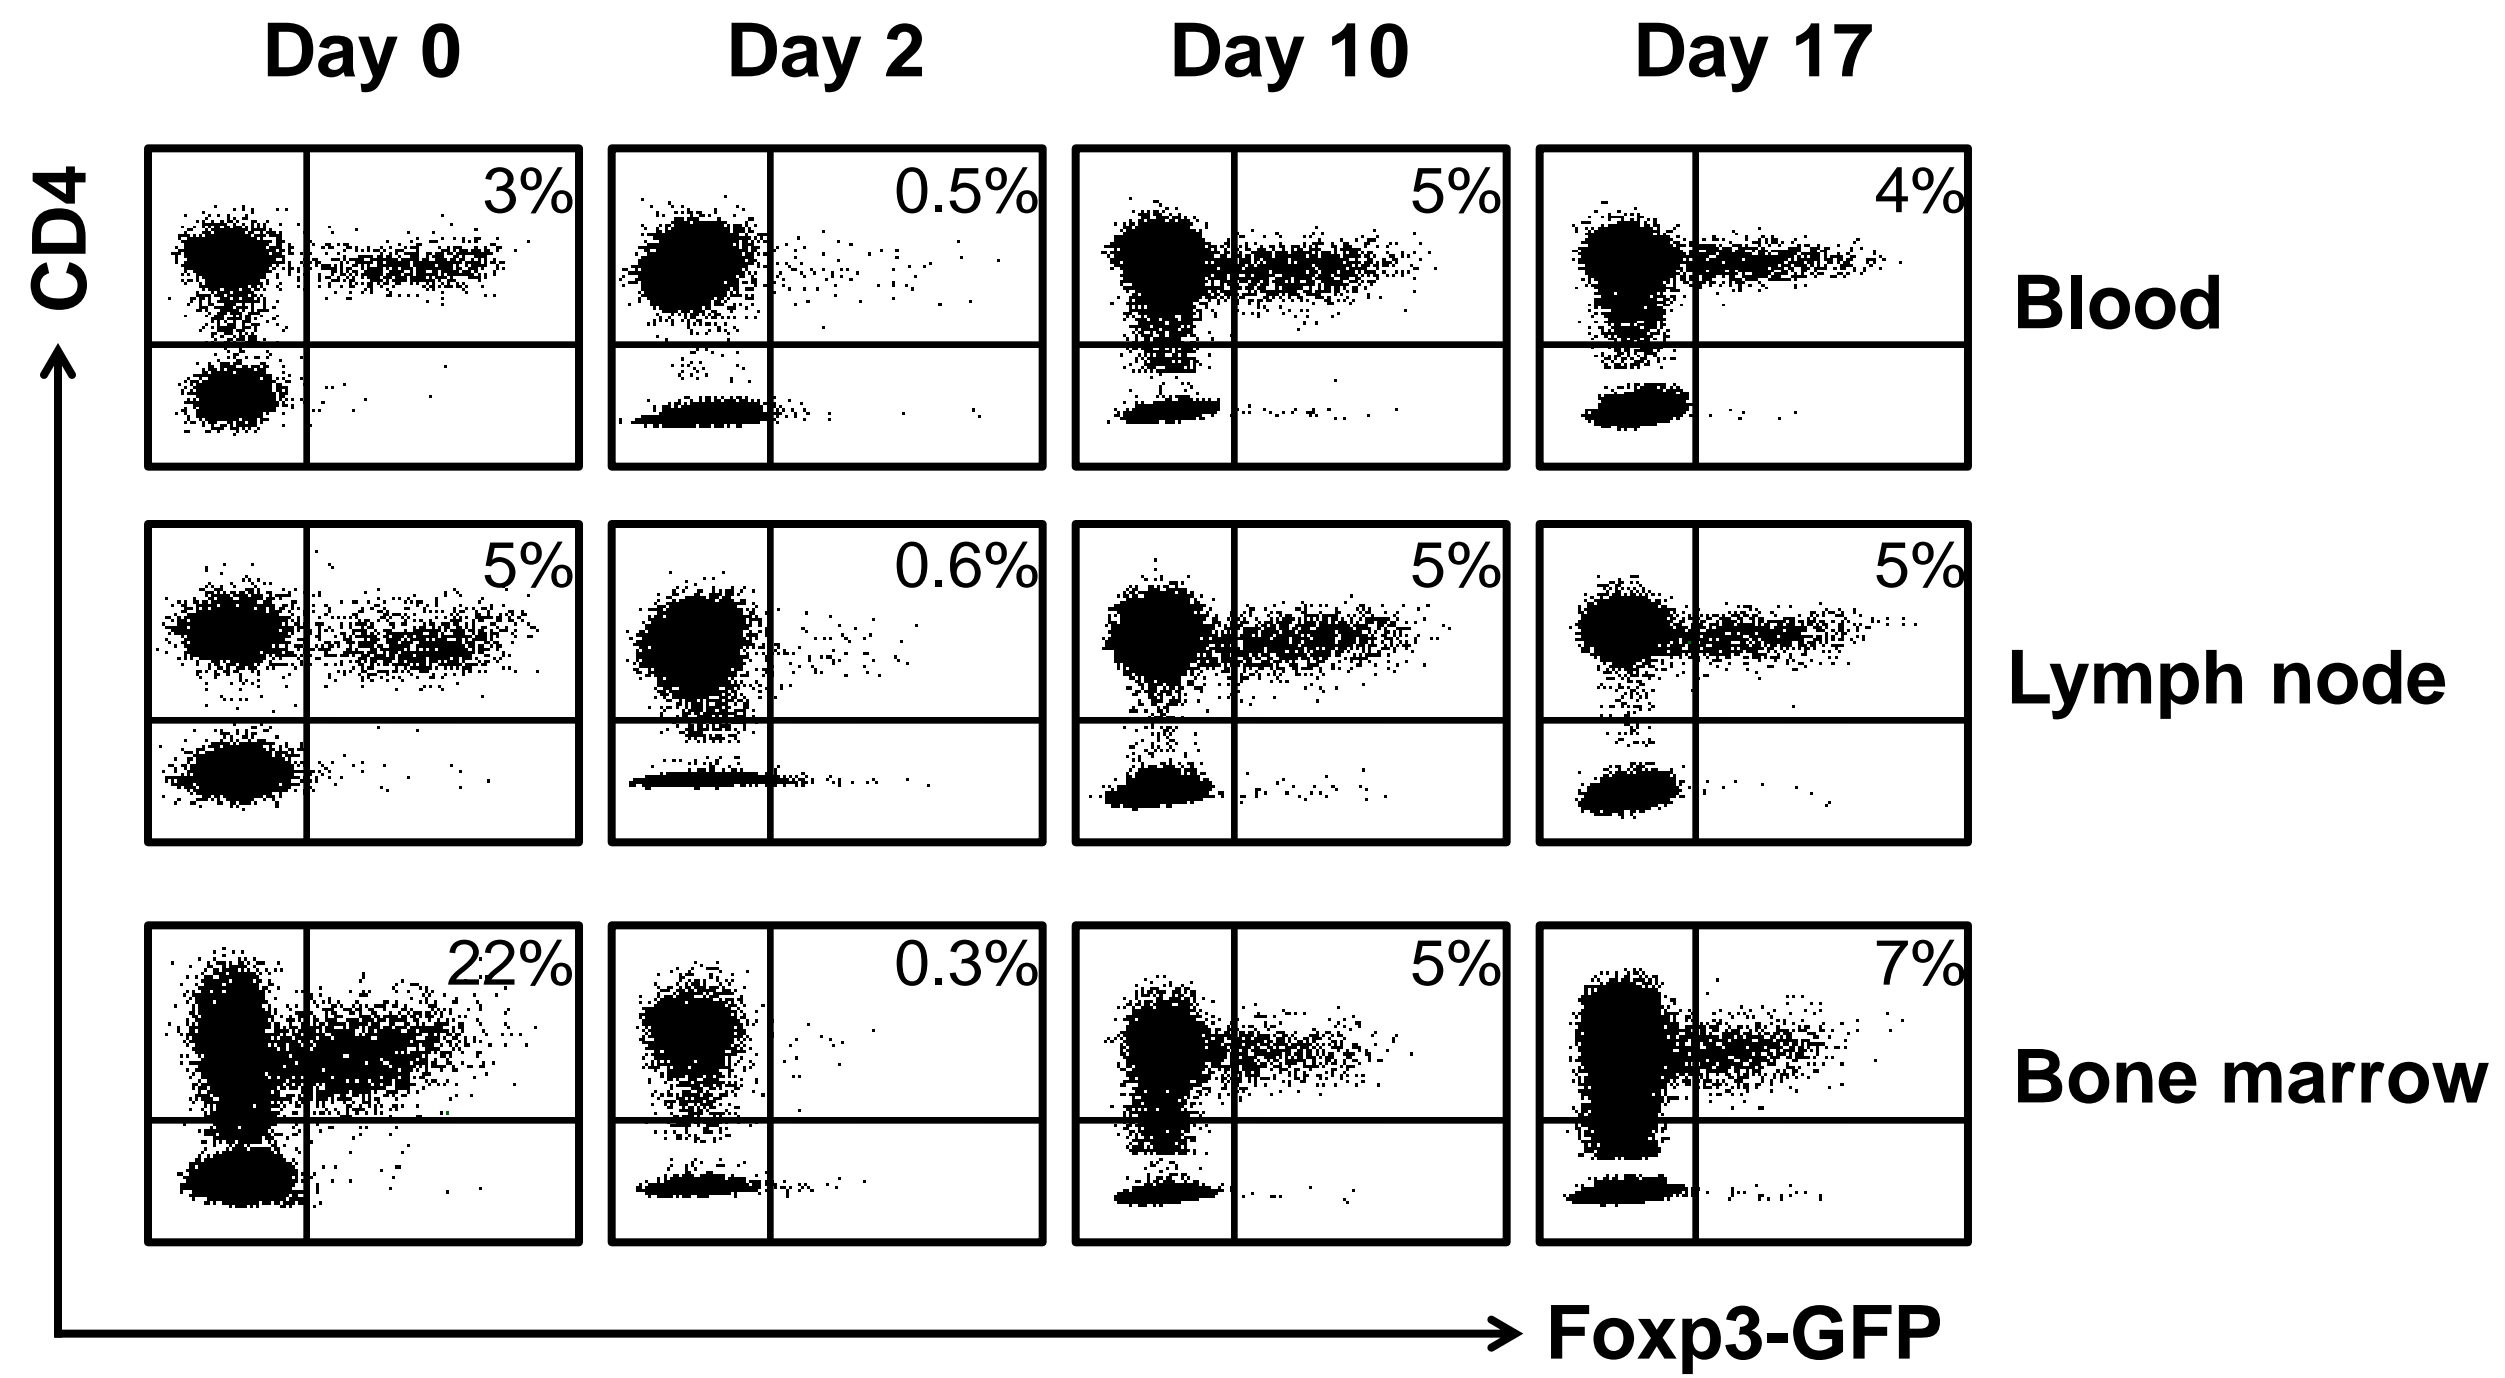

**Supplementary Table 1. RT-PCR primers information**

| <b>Name</b>  | <b>Forward</b>         | <b>Reverse</b>            | <b>Size</b> |
|--------------|------------------------|---------------------------|-------------|
| <b>CCND1</b> | GGCCATGCTGAAGGCGGAGG   | GCTCCAGCGACAGGAAGCGG      | 191         |
| <b>CCND3</b> | CCTCCAAGCTGCGCGAGACC   | GGCAGAGAGAGCCGGTGCAG      | 184         |
| <b>CCNE1</b> | AGCCCCATCATGCCGAGGGA   | TGGGGATCAGGGAGCAGGGG      | 238         |
| <b>p16</b>   | ATGCCGCGGAAGGTCCCTCA   | AAAGCGGGGTGGGTTGTGGC      | 136         |
| <b>p18</b>   | GGAACGAGTTGGCGTCCGCA   | GGAAACCTGCTCTGGCCGCA      | 233         |
| <b>p19</b>   | GAGCTGGTGCATCCCGACG    | GGGCAGGAGAAACAAGAAGAGAAAG | 504         |
| <b>p21</b>   | GCCCAGTGGACAGCGAGCAG   | GCCGGCGTTTGGAGTGGTAGA     | 402         |
| <b>p27</b>   | GCGACCTGCAACCGACGATTCT | GAGGCCAGGCTTCTTGGGCG      | 121         |
| <b>GAPDH</b> | GAAGGTGAAGGTCCGAGT     | GAAGATGGTGTATGGGATTC      | 225         |
